# Supplementary material for: Patterns of child mortality in rural area of Burkina Faso: evidence from the Nanoro health and demographic surveillance system (HDSS)
Source: Springer Nature journal article supplement (doi:10.1186/s12889-021-11483-4), 2021-07-19
Supplement: MOESM1 [file 19373446]

## Supplementary Material:

# Spatial patterns of child mortality in Nanoro HDSS site, Burkina Faso

Navideh Noori<sup>1\*‡</sup>, Karim Derra<sup>2‡</sup>, Innocent Valea<sup>2,3</sup>, Assaf P. Oron<sup>1</sup>, Palwende Romuald Boua<sup>2</sup>, Aminata Welgo<sup>2</sup>, Toussaint Rouamba<sup>2</sup>, Athanase M. Somé<sup>2</sup>, Eli Rouamba<sup>2</sup>, Edward Wenger<sup>1</sup>, Hermann Sorgho<sup>2</sup>, Halidou Tinto<sup>2,3</sup>, and Andre Lin Ouédraogo<sup>1</sup>

<sup>1</sup>Institute for Disease Modeling, Global Health Division, Bill & Melinda Gates Foundation, 500 5th Ave N, Seattle, WA, 98109, USA.

<sup>2</sup>Institut de Recherche en Sciences de la Sante (IRSS)/Clinical Research Unit of Nanoro (CRUN), Nanoro, Burkina Faso

<sup>3</sup>Laboratory of Parasitology and Entomology, Centre Muraz, Bobo-Dioulasso, Burkina Faso

\*Corresponding author

‡Equally contributed

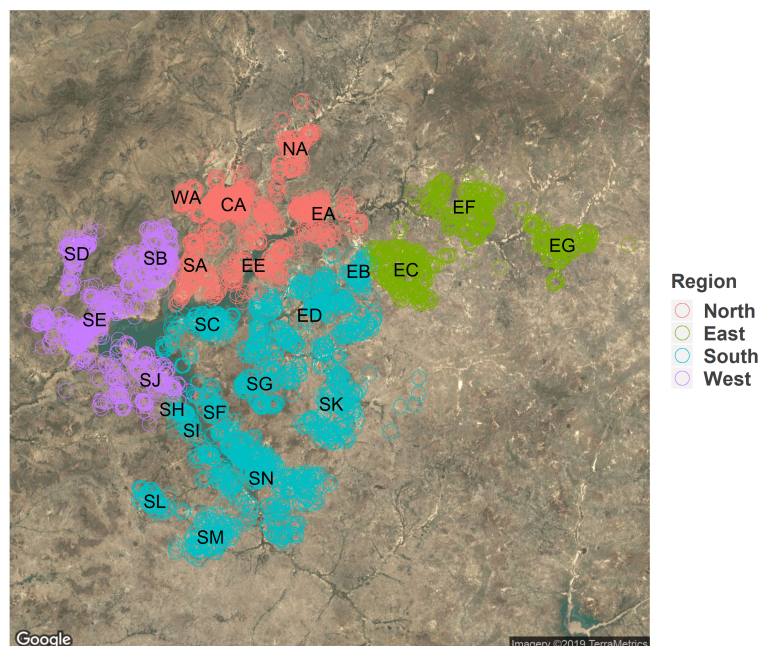

**Figure S 1.** The Nanoro health district is divided to four regions; north, east, south and west of lake.

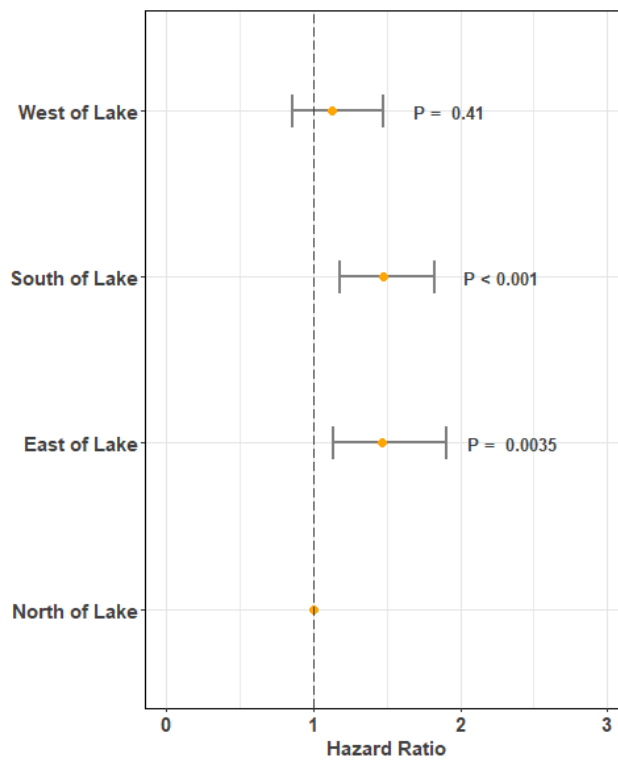

**Figure S 2.** Hazard ratios associated with the probability of mortality of children under-5. Risk factors reducing the probability of death have hazard ratios lower than 1 to the left of the vertical dashed line. Hazard ratios (yellow points), 95% confidence intervals (horizontal lines) and the p values are given. The variables with the yellow points on the vertical dashed line represent the reference groups.

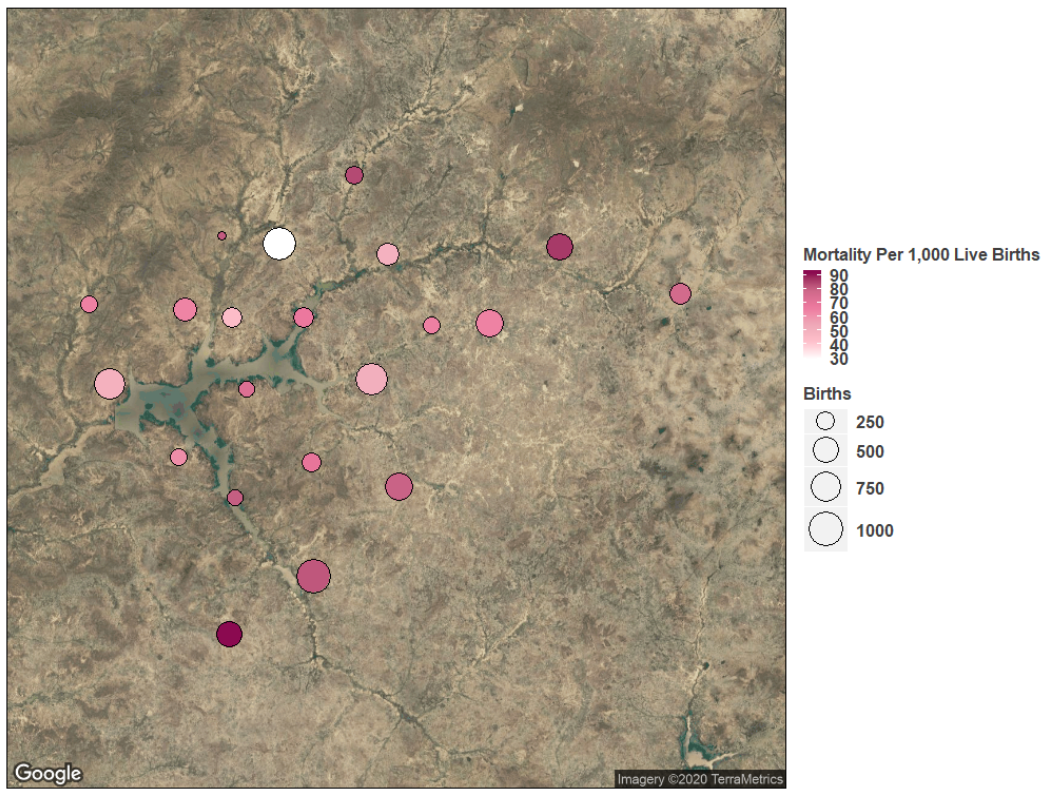

**Figure S 3.** Mortality per 1,000 live births per village for children under-5. Each circle represents a village and the size of circle represents the number of live births. The lighter color indicates lower mortality rate and darker color indicates a higher mortality rate.

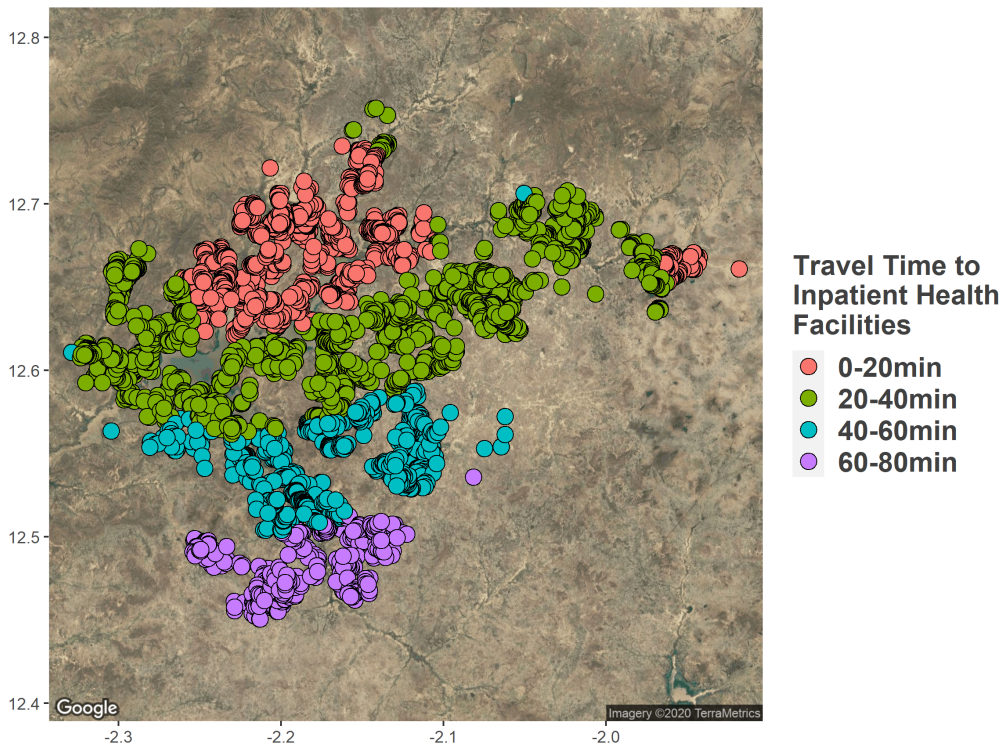

**Figure S 4.** Travel time of children under-5, living in the Nanoro health district, from an inpatient health facility. Each circle represents an individual.

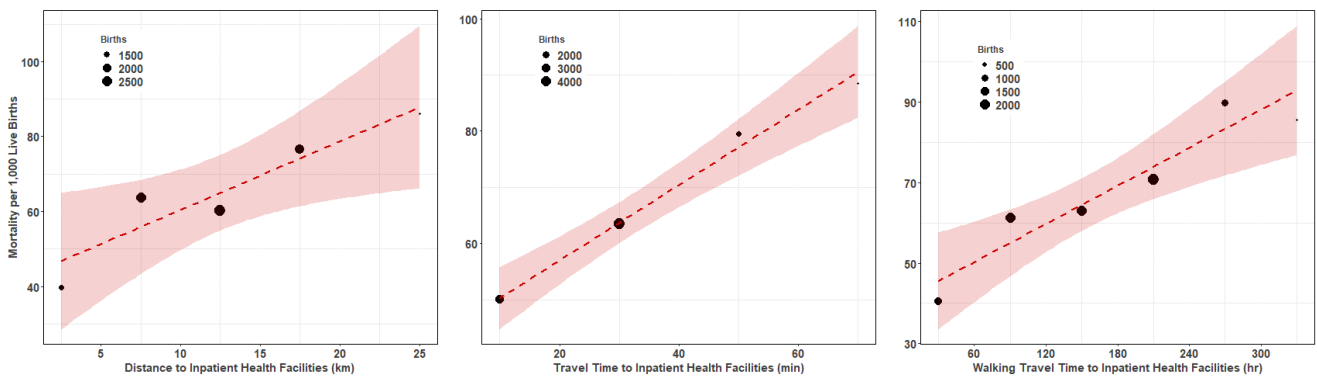

**Figure S 5.** Mortality per 1,000 live births for children under-5 versus subgroups of distance, travel time and walking travel time to inpatient health facilities. Circle size represents the number of births within each subgroup.

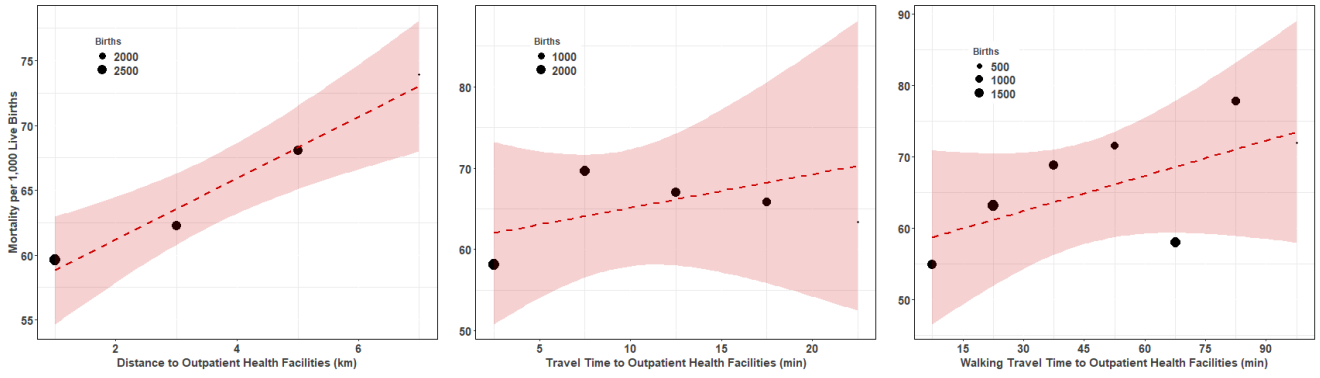

**Figure S 6.** Mortality per 1,000 live births for children under-5 versus subgroups of distance, travel time and walking travel time to outpatient health facilities. Circle size represents the number of births within each subgroup.

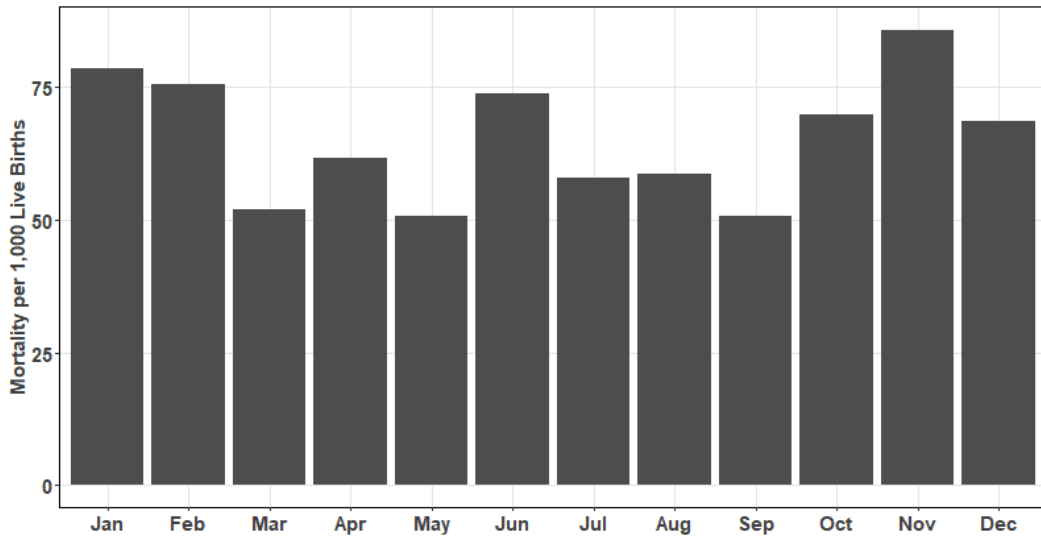

**Figure S 7.** Mortality per 1,000 live births for each event month.

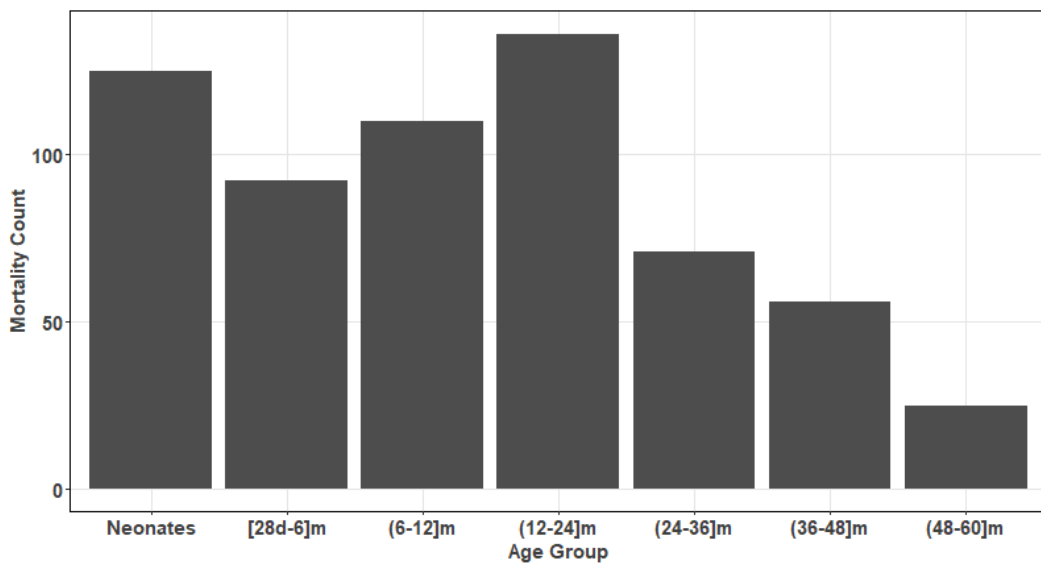

**Figure S 8.** Mortality count by age group.

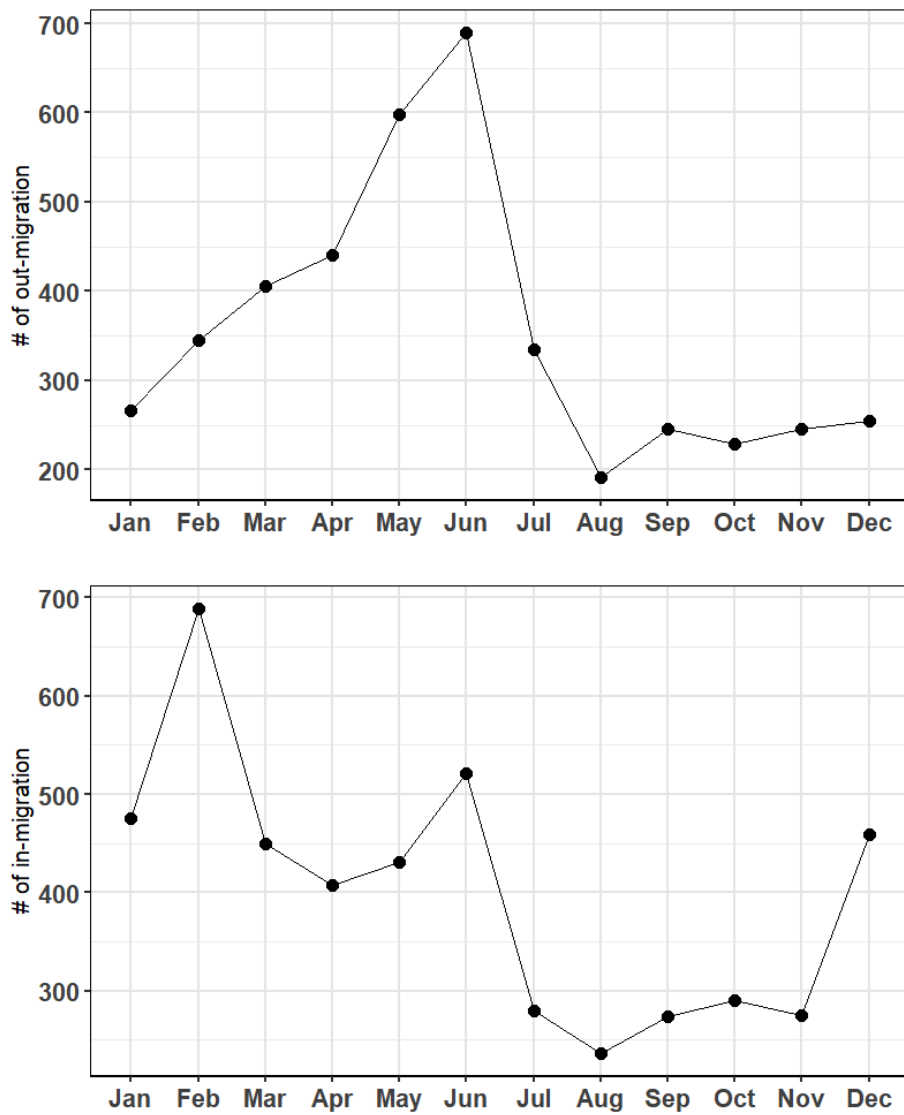

**Figure S 9.** In- and out-migration count by month.

**Table S 1.** Results of unadjusted Cox regression models for under-5 mortality. Hazard Ratios are presented with 95% confidence intervals in parentheses.

| Parameters                                                       | Mortality per 1,000 live births | Hazard ratio       | P-value |
|------------------------------------------------------------------|---------------------------------|--------------------|---------|
| <b>Distance to inpatient health facilities (km)</b>              |                                 |                    |         |
| [0 – 5)                                                          | 39.69                           | -                  | -       |
| [5 – 10)                                                         | 63.70                           | 1.48 (1.02,2.24)   | 0.045   |
| [10 – 15)                                                        | 60.19                           | 1.42 (0.94,2.22)   | 0.11    |
| [15 – 20)                                                        | 76.52                           | 1.77 (1.16,2.69)   | 0.008   |
| 20+                                                              | 86.05                           | 2.04 (1.34,3.09)   | < 0.001 |
| <b>Walking travel time to inpatient health facilities (hr)</b>   |                                 |                    |         |
| [0 – 1)                                                          | 40.39                           | -                  | -       |
| [1 – 2)                                                          | 61.31                           | 1.39 (0.94, 2.07)  | 0.09    |
| [2 – 3)                                                          | 62.98                           | 1.45 (0.95, 2.21)  | 0.08    |
| [3 – 4)                                                          | 70.77                           | 1.63 (1.05, 2.53)  | 0.03    |
| [4 – 5)                                                          | 89.92                           | 2.05 (1.35, 3.108) | < 0.001 |
| 5+                                                               | 85.5                            | 2.08 (1.18, 3.66)  | 0.01    |
| <b>Distance to outpatient health facilities (km)</b>             |                                 |                    |         |
| [0 – 2)                                                          | 59.6                            | -                  | -       |
| [2 – 4)                                                          | 68.07                           | 1.13 (0.85, 1.5)   | 0.43    |
| [4 – 6)                                                          | 62.27                           | 1.03 (0.76, 1.4)   | 0.85    |
| 6+                                                               | 73.93                           | 1.19 (0.84, 1.72)  | 0.32    |
| <b>Walking travel time to outpatient health facilities (min)</b> |                                 |                    |         |
| [0 – 15)                                                         | 54.89                           | -                  | -       |
| [15 – 30)                                                        | 63.1                            | 1.14 (0.68,1.92)   | 0.62    |
| [30 – 45)                                                        | 68.77                           | 1.26 (0.79,2.02)   | 0.34    |
| [45 – 60)                                                        | 71.5                            | 1.24 (0.73,2.10)   | 0.41    |
| [60 – 75)                                                        | 58.09                           | 1.05 (0.64,1.73)   | 0.85    |
| [75 – 90)                                                        | 77.8                            | 1.37 (0.79,2.35)   | 0.24    |
| 90+                                                              | 71.9                            | 1.31 (0.72,2.37)   | 0.38    |
| <b>Gender</b>                                                    |                                 |                    |         |
| Male                                                             | 66.87                           | -                  | -       |
| Female                                                           | 62.83                           | 0.94 (0.80,1.1)    | 0.43    |
| <b>Religion</b>                                                  |                                 |                    |         |
| Animist                                                          | 71.71                           | -                  | -       |
| Catholic                                                         | 54.58                           | 0.85 (0.67, 1.083) | 0.19    |
| Muslim                                                           | 66.14                           | 1.03 (0.83, 1.29)  | 0.75    |
| Protestant                                                       | 51.65                           | 0.74 (0.52,1.05)   | 0.1     |
| Unknown                                                          | 155.04                          | 1.82 (1.24, 2.65)  | 0.002   |
| <b>Ethnicity</b>                                                 |                                 |                    |         |
| Mossi                                                            | 63.61                           | -                  | -       |
| Peulh                                                            | 43.67                           | 0.73 (0.38, 1.41)  | 0.35    |
| Gourounsi                                                        | 60                              | 0.93 (0.77,1.12)   | 0.43    |
| Unknown                                                          | 137.4                           | 1.68 (1.31,2.16)   | < 0.001 |
| <b>Maternal education status*</b>                                |                                 |                    |         |
| No Education                                                     | 43.79                           | -                  | -       |
| Some Education                                                   | 20.07                           | 0.48 (0.27,0.84)   | 0.01    |
| <b>Multiple birth status*</b>                                    |                                 |                    |         |
| Singleton                                                        | 39.20                           | -                  | -       |
| Twin/Triplet/Quadruplet                                          | 97.11                           | 2.59 (1.72,3.91)   | < 0.001 |

\* Children born after the HDSS establishment.

**Table S 2.** Results of unadjusted cox regression models for under-5 mortality per 1,000 live births. Each risk factor was fitted to the model as a continuous variable. Hazard Ratios are presented with 95% confidence intervals in parentheses.

| Parameters                                                | Children Under-5    |         |
|-----------------------------------------------------------|---------------------|---------|
|                                                           | Hazard Ratio        | P-value |
| Event month                                               | 1.05 (1.01,1.8)     | 0.009   |
| Age (month)                                               | 0.97 (0.96,0.98)    | < 0.001 |
| Distance to inpatient health facilities (km)              | 1.03 (1.015,1.048)  | < 0.001 |
| Travel time to inpatient health facilities (min)          | 1.01 (1.004,1.015)  | < 0.001 |
| Walking travel time to inpatient health facilities (min)  | 1.002 (1.001,1.004) | < 0.001 |
| Distance to outpatient health facilities (km)             | 1.022 (0.96,1.089)  | 0.46    |
| Travel time to outpatient health facilities (min)         | 1.008 (0.985,1.031) | 0.51    |
| Walking travel time to outpatient health facilities (min) | 1.002 (0.997,1.007) | 0.40    |
